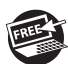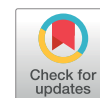

## Issues and Events

### PROFESSIONAL EDUCATION

The American Diabetes Association offers a variety of continuing education opportunities and materials for health care professionals. Educational offerings include live and free online programs. For more information, including a complete list of American Diabetes Association programs, please visit [professional.diabetes.org/ce](http://professional.diabetes.org/ce).

### SCIENTIFIC SESSIONS

The 79th annual American Diabetes Association Scientific Sessions will be held in San Francisco, California, on 7–11 June 2019, at the Moscone Center. The largest of its kind, this meeting brings together scientists and health care professionals from around the world who are involved in diabetes research and care. Attendees choose from over 3,000 original presentations given by leading experts in the field. For more information, please visit [scientificsessions.diabetes.org](http://scientificsessions.diabetes.org).

### 78th SCIENTIFIC SESSIONS WEBCASTS

Webcasts from the 78th annual American Diabetes Association Scientific Sessions are available. Held in June 2018, this meeting brought together scientists and health care professionals to discuss issues pertaining to diabetes research, care, and education. To access the webcasts, please visit [professional.diabetes.org/webcasts-ss2018](http://professional.diabetes.org/webcasts-ss2018).

### ADVANCED POSTGRADUATE COURSE

The 66th annual American Diabetes Association Advanced Postgraduate Course will be held in New York, New York, on 22–24 February 2019. Join your colleagues and diabetes experts for presentations and discussions on cutting-edge clinical research in diabetes. The course will cover the latest clinical research translated into evidence-based treatment strategies to improve outcomes in your patients with diabetes. Discuss clinical cases with world-renowned faculty, and take home practical patient management tools that you can use

immediately in your practice. For more information, please visit [professional.diabetes.org/ce](http://professional.diabetes.org/ce).

### ADVANCED POSTGRADUATE COURSE WEBCASTS

Webcasts from the 65th annual American Diabetes Association Advanced Postgraduate Course are available. Held in February 2018, the American Diabetes Association brought together professionals and diabetes experts for presentations and discussions on cutting-edge clinical research in diabetes. The courses covered the latest clinical research translated into evidence-based treatment strategies to improve outcomes in patients with diabetes. To access the webcasts, please visit [ada.healthmonix.com/allcourses](http://ada.healthmonix.com/allcourses).

### 34th ANNUAL CLINICAL CONFERENCE ON DIABETES

The 34th Annual Clinical Conference on Diabetes will be held in Orlando, Florida, on 23–26 May 2019 at the Hyatt Regency Orlando. It will provide a comprehensive update on the treatment of diabetes, cardiovascular disease, obesity, and comorbidities. The ADA Clinical Conference is developed specifically to provide current clinical information utilizing different teaching methods, including didactic general sessions and small-group, interactive learning opportunities. For more information, please visit [professional.diabetes.org/ce](http://professional.diabetes.org/ce).

### DIABETES CORE UPDATE PODCASTS

*Diabetes Core Update* is a monthly audio podcast devoted to presenting and discussing the latest clinically relevant articles from the American Diabetes Association's scholarly journals. *Diabetes Core Update* audio podcasts are free and can be accessed through iTunes or RSS feed. For more information, please visit [diabetesjournals.org/content/diabetes-core-update-podcasts](http://diabetesjournals.org/content/diabetes-core-update-podcasts).

**Diabetes Care** (print ISSN 0149-5992, online ISSN 1935-5548) is owned, controlled, and published monthly by the American Diabetes Association, Inc., 2451 Crystal Drive, Suite 900, Arlington, VA 22202. *Diabetes Care* is a registered trademark of the American Diabetes Association. **Periodicals postage** paid at Arlington, VA, and additional mailing offices. **POSTMASTER:** Send address changes to *Diabetes Care*, American Diabetes Association, Inc., Journal Subscriptions, 2451 Crystal Drive, Suite 900, Arlington, VA 22202. Claims for missing issues should be made within 6 months of publication. The publisher expects to supply missing issues free of charge only when losses have been sustained in transit and when the reserve stock permits.
